# Supplementary material
Source: PubMed Central journal article supplement (PMC2854042)

Suppl. Fig. 1. Davoli et al.

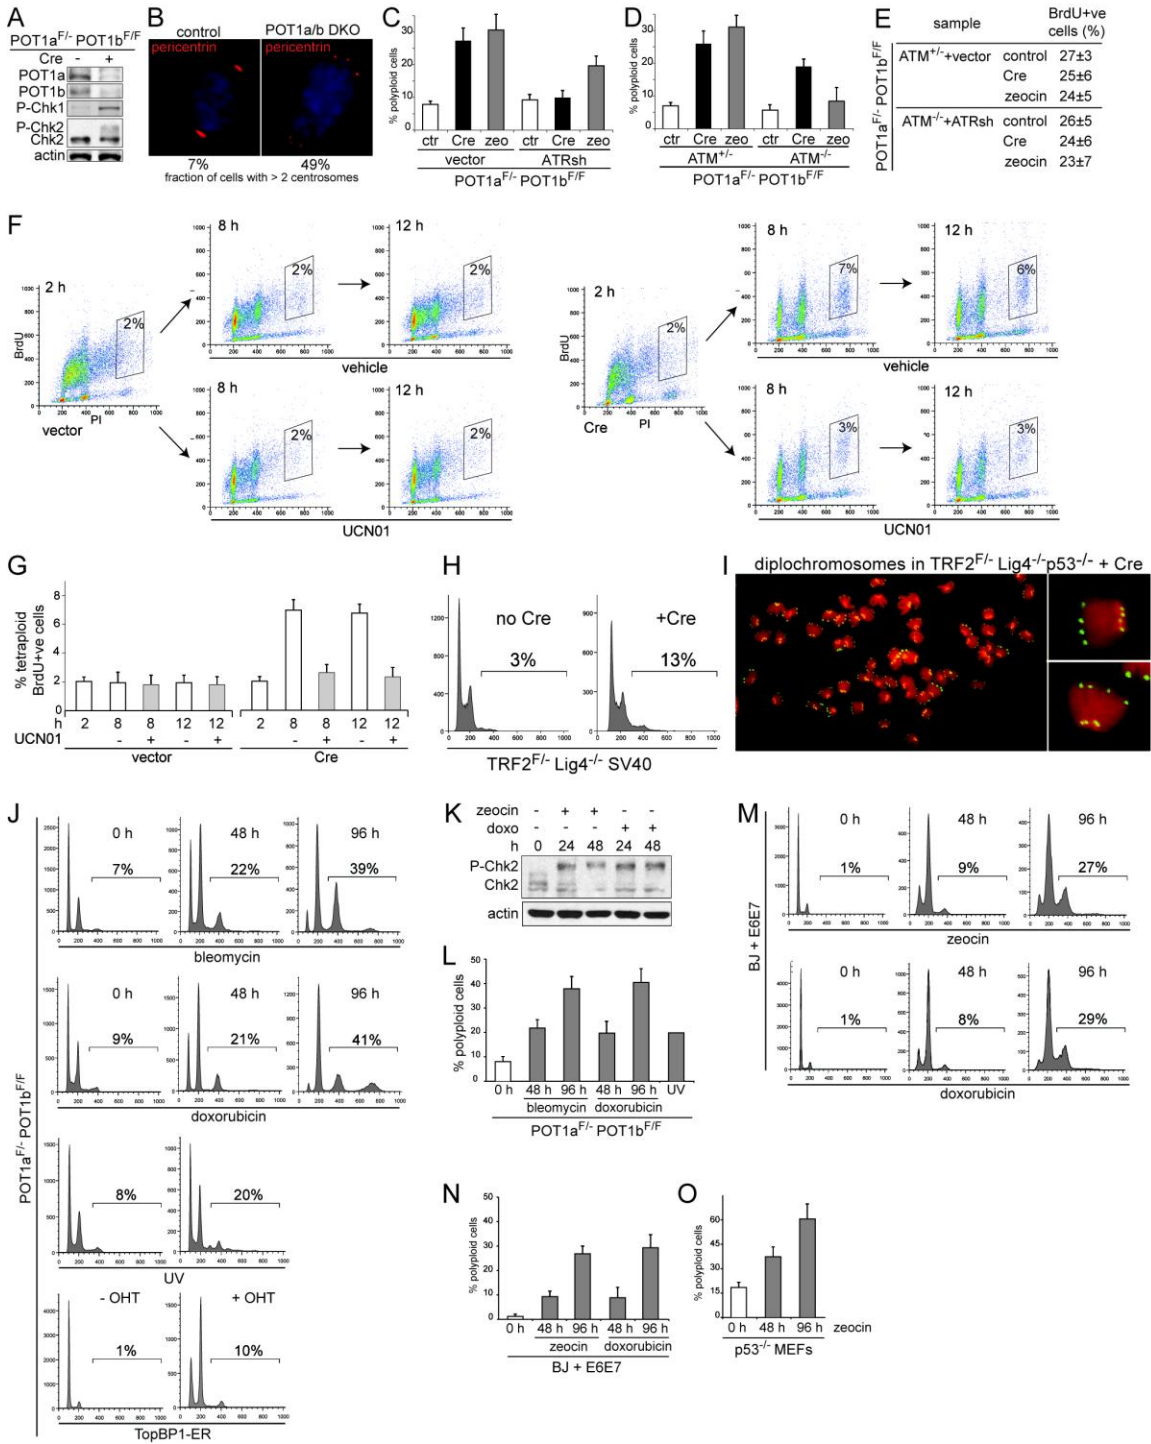

Suppl. Figure 2. Davoli et al.

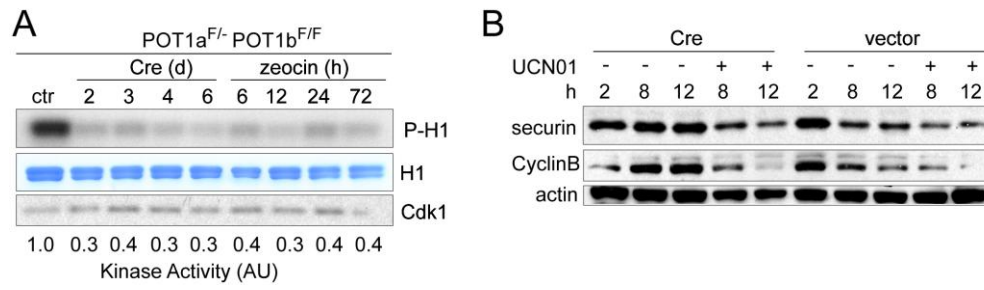

Suppl. Fig. 3. Davoli et al.

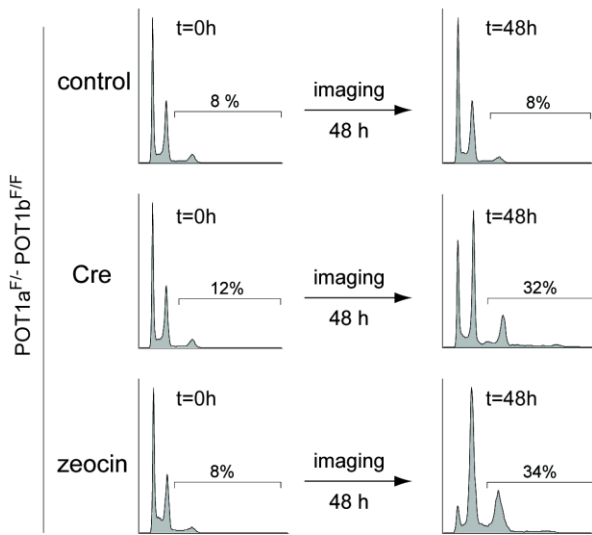

Suppl. Figure 4. Davoli et al.

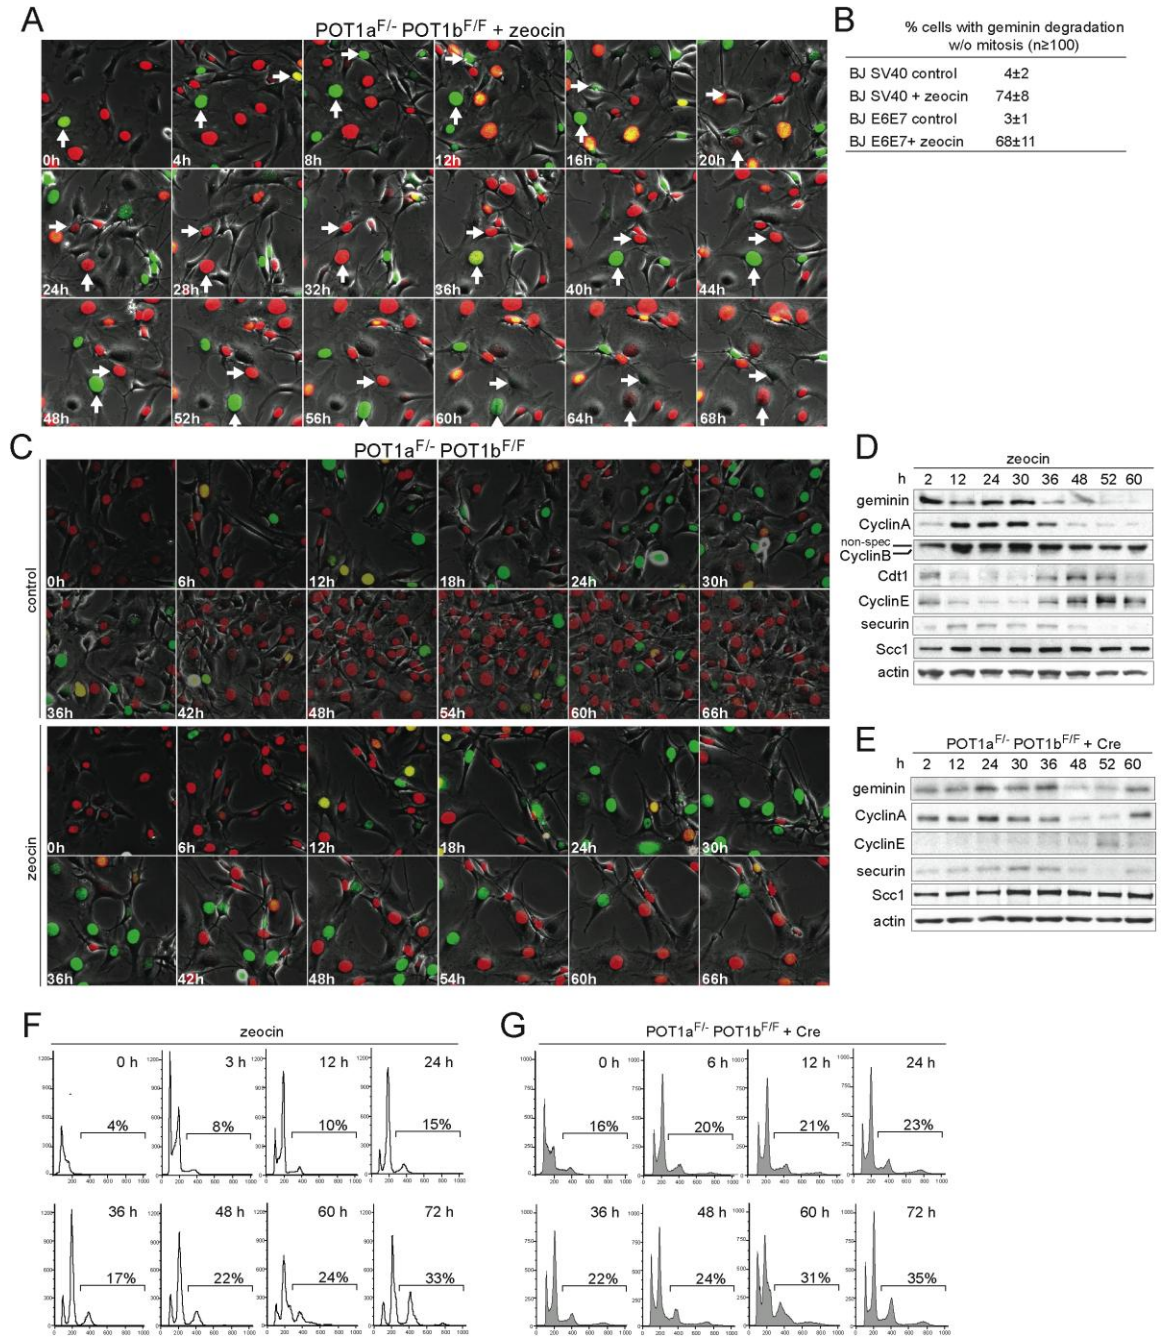

Suppl. Figure 5. Davoli et al.

A

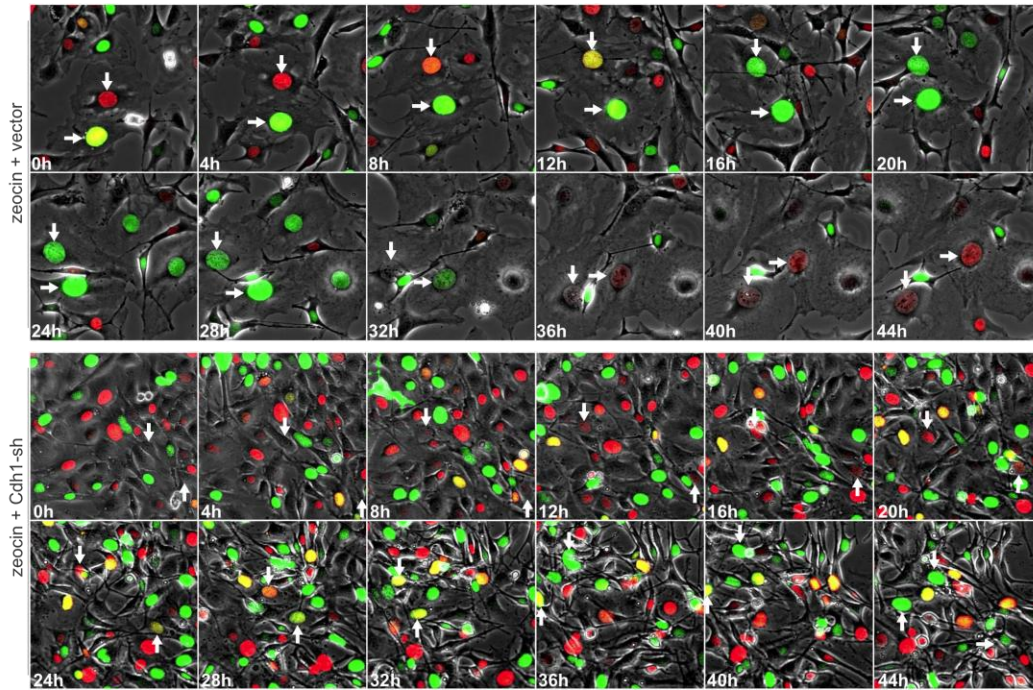

B

|                  | % cells with geminin degradation w/o mitosis (n≥100) |
|------------------|------------------------------------------------------|
| zeocin           | 86±5                                                 |
| zeocin + Cdh1 sh | 13±7                                                 |

C

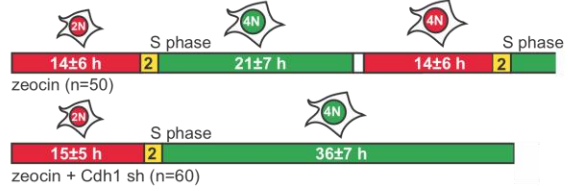

D

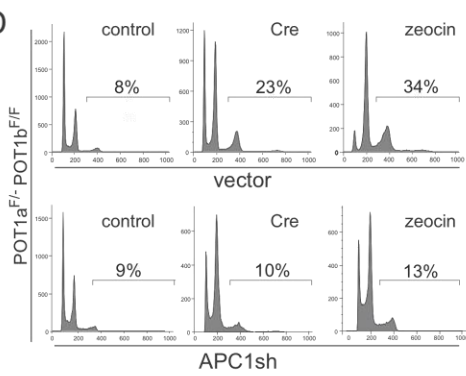

E

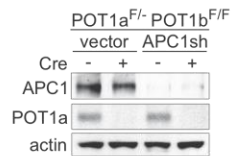

F

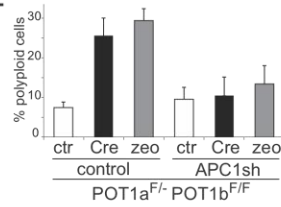

Supplement: NIHMS180561-supplement-03.pdf [file NIHMS180561-supplement-03.pdf]
